# Supplementary material for: Activation of the zinc-sensing receptor GPR39 promotes T-cell reconstitution after hematopoietic cell transplant in mice
Source: PubMed Central journal article supplement — Blood. 2022 Jun 23;139(25):3655–66. doi: 10.1182/blood.2021013950 (PMC9227099; doi:10.1182/blood.2021013950), 2022-06-23
Supplement: bloodBLD2021013950-suppl1.pdf [file bloodBLD2021013950-suppl1.pdf]

**Figure S1**

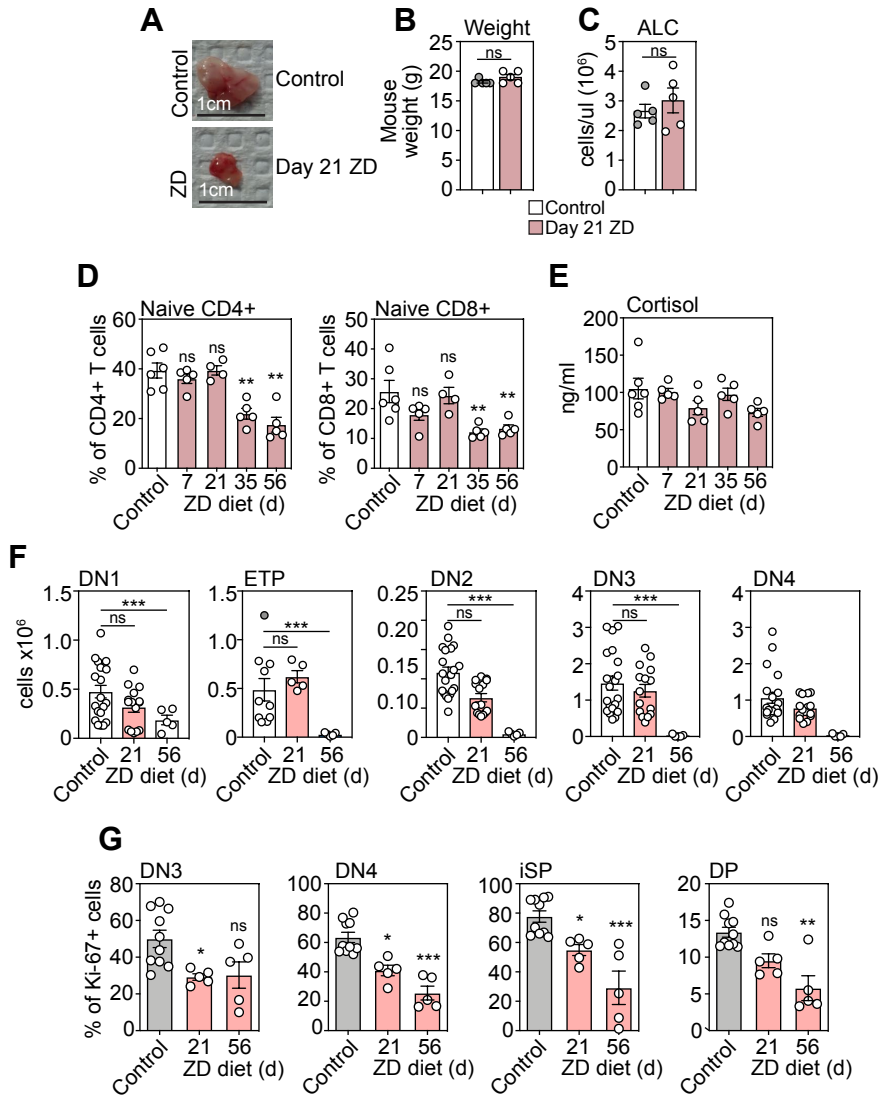

**Supplementary Figure 1**

6-8-week-old female C57BL/6 mice were fed a normal or Zn-deficient (ZD) diet for up to 56 days. **A**, Photos of the thymus from mice fed either control diet or ZD diet for 21 days. **B**, Weight of thymuses isolated after 21 days of ZD diet. **C**, Absolute lymphocyte counts (ALC) on the peripheral blood after 21 days of ZD diet. **D**, Proportion of naïve CD4<sup>+</sup> or CD8<sup>+</sup> T cells (as a proportion of total CD4<sup>+</sup> or CD8<sup>+</sup> T cells) after 1, 3, 5, or 8 weeks of ZD diet. **E**, Concentration of cortisol in serum of mice that had received control diet (ctrl), and after 1, 3, 5, and 8 weeks of ZD diet. **F**, Number of CD44<sup>+</sup>CD25<sup>-</sup> DN1, CD44<sup>+</sup>CD25<sup>c-kit</sup><sup>+</sup> ETP, CD44<sup>+</sup>CD25<sup>+</sup> DN3, or CD44<sup>-</sup>CD25<sup>-</sup>CD90<sup>+</sup> DN4 (untreated, n=24, combined from animals harvested alongside either day 21 or day 56 mice; day 21, n=15 over three independent experiments; day 56, n=10 over two independent experiments). **G**, Proportion of Ki-67<sup>+</sup> events gated on CD4-CD8-Thy1<sup>+</sup> CD25<sup>+</sup>CD44<sup>-</sup> DN (DN3), CD4-CD8-Thy1<sup>+</sup> CD25<sup>-</sup>CD44<sup>-</sup> DN (DN4), CD3-CD4-CD8<sup>+</sup> (iSP), CD4<sup>+</sup>CD8<sup>+</sup> (DP) from untreated mice or after 21 or 56 days of ZD. Graphs represent mean  $\pm$  SEM, each dot represents a biologically independent observation. \*, p < 0.05; \*\*, p < 0.01; \*\*\* p < 0.001

**Figure S2**

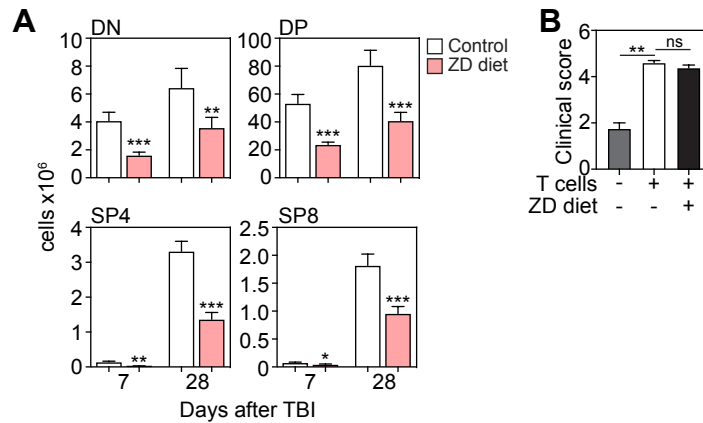

**Supplementary Figure 2**

**A**, 6-8 week-old female C57BL/6 mice were fed a normal or ZD diet for 21 days at which point mice were given a sublethal dose of total body irradiation (TBI, 550cGy). Absolute number of DN, DP, SP4, and SP8 thymocyte subsets was calculated on day 7 and day 28 after TBI. **B**, 6 wo BALB.B mice were fed a normal or ZD diet for 21 days after which they were transplanted with  $5 \times 10^6$  TCD BM from B6 mice. GVHD groups were given a dose of  $2 \times 10^6$  purified T cells. GVHD clinical score on day 7. Graphs represent mean  $\pm$  SEM, each dot represents a biologically independent observation. \*,  $p < 0.05$ ; \*\*,  $p < 0.01$ ; \*\*\*,  $p < 0.001$ .

**Figure S3**

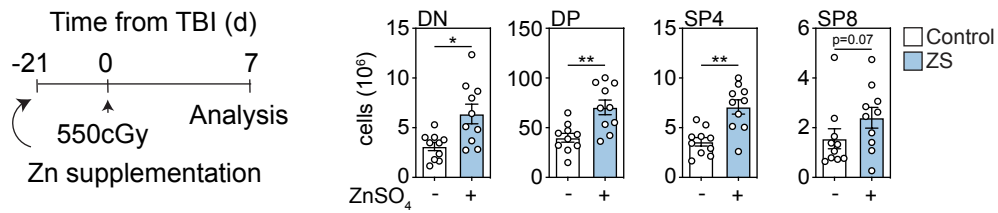

**Supplementary Figure 3**

6-8-week-old C57BL/6 female mice were given supplemental Zn in drinking water (300mg/kg/day ZnSO<sub>4</sub>) for 21 days at which point mice were given 550 cGy TBI. Mice were maintained on Zn-supplemented drinking water for the duration of the study. Absolute number of DN, DP, SP4, and SP8 thymocyte subsets was calculated on day 7 after TBI. Graphs represent mean  $\pm$  SEM, each dot represents a biologically independent observation. \*,  $p < 0.05$ ; \*\*,  $p < 0.01$ ; \*\*\*,  $p < 0.001$ .

**Figure S4**

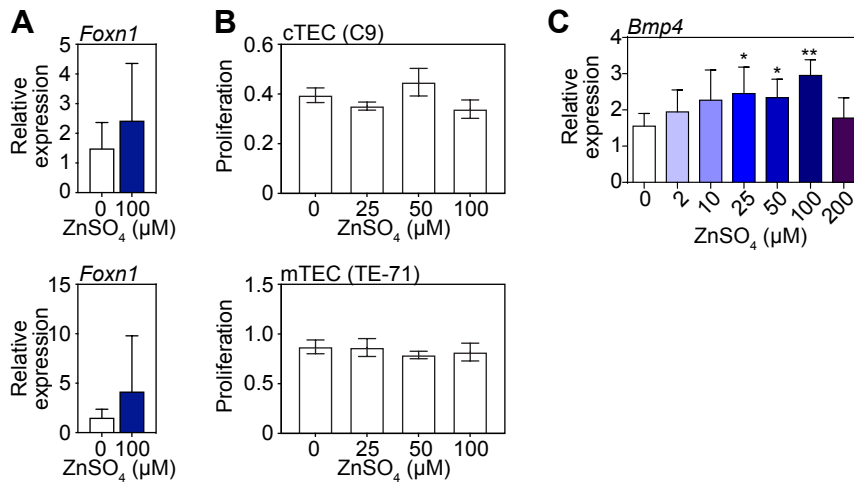

**Supplementary Figure 4**

**A**, Thymic epithelial cell lines (C9, cTEC; TE-71, mTEC) were cultured with 100μM ZnSO<sub>4</sub> for 24h when *Foxn1* expression was quantified by qPCR (n=3 independent experiments). **B**, C9 or TE-71 cells were incubated with graded doses of ZnSO<sub>4</sub> for 24h after which proliferation was assessed. **C**, exEC cells were incubated with graded doses of ZnSO<sub>4</sub> for 24h after which *Bmp4* expression was quantified by qPCR (n=3-6 independent experiments). Graphs represent mean ± SEM, each dot represents a biologically independent observation (n=3 independent experiments). \*, p<0.05; \*\*, p<0.01; \*\*\*, p<0.001.

**Figure S5**

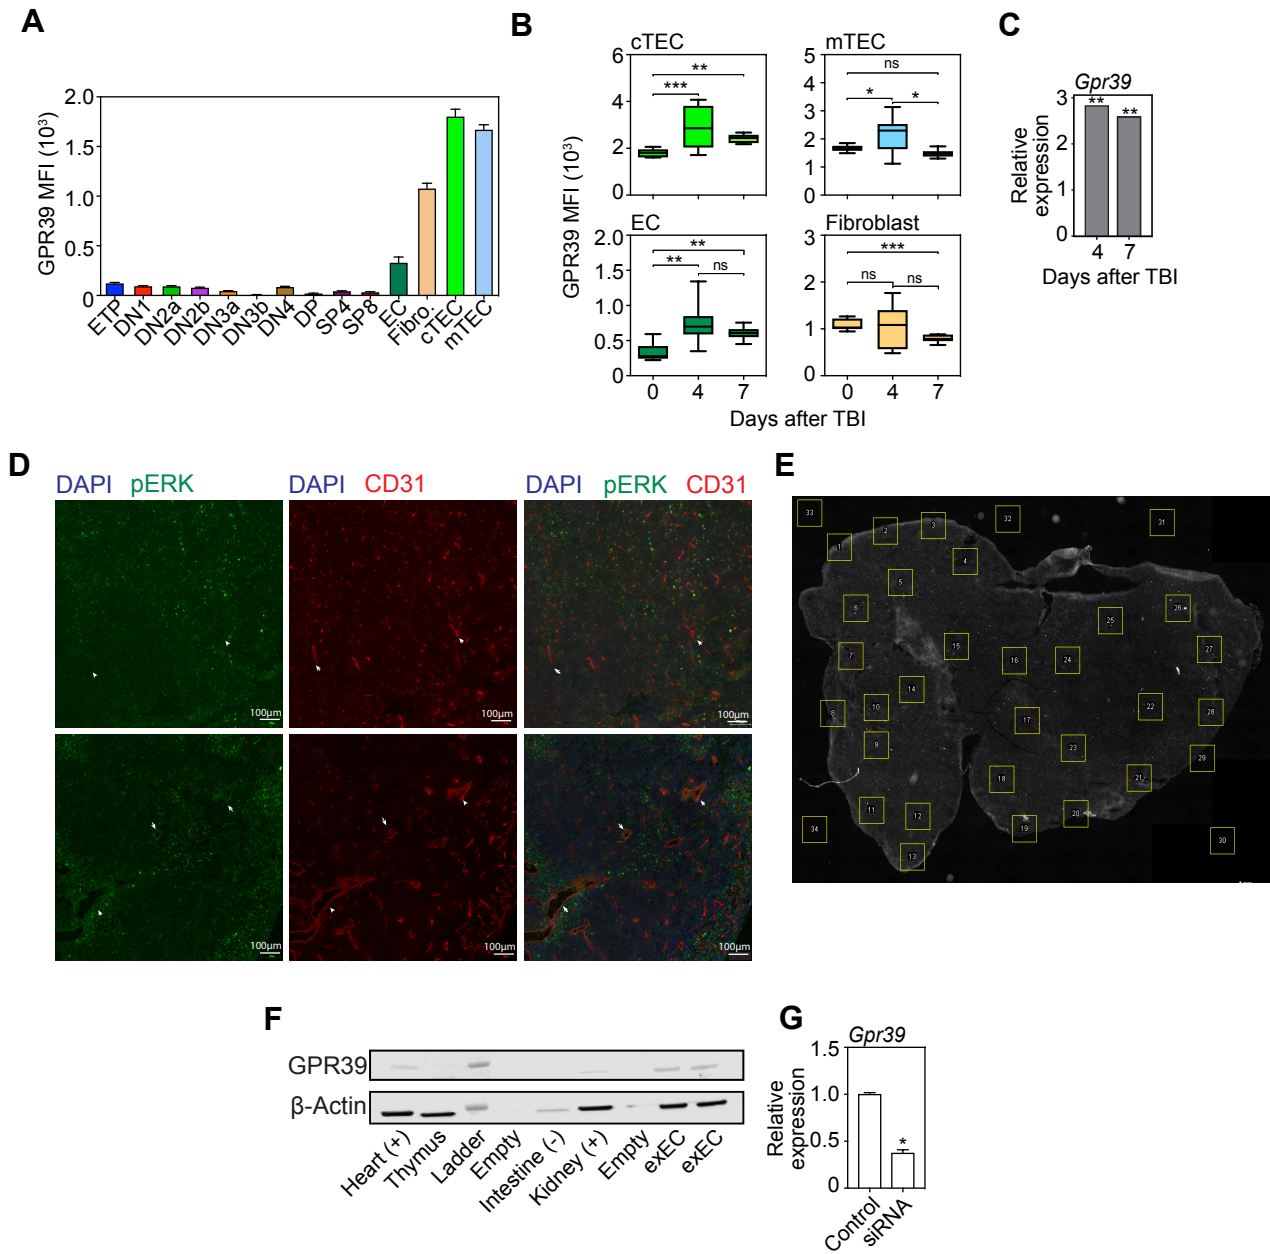

**Supplementary Figure 5**

**A**, GPR39 expression (MFI) across subsets in the thymus by flow cytometry at baseline. **B**, Expression of GPR39 on cTECs, mTECs, ECs and Fibroblasts at days 0, 4, and 7 after TBI. **C**, Thymic non-hematopoietic stromal cells were isolated from 6-week-old female C57BL/6 mice using CD45 MACS cell depletion at days 0, 4, and 7 after a single dose sub-lethal total body radiation (SL-TBI) and microarray analysis performed as previously described (Wertheimer et al., 2018) (GSE106982). Displayed is the differential gene expression fold-change of *Gpr39* comparing day 4 to day 0 or day 7 to day (n=3; CD45<sup>-</sup> cells were pooled from 3-4 mice/n). **D**, ERK phosphorylation (pERK) *in situ* assessed at steady state. Co-expression of pERK (green) and VECAM (CD31, red) in thymic endothelial cells (yellow). The white arrowheads highlight the endothelial cells **E**, Regions of interest (ROI) of the same size were created to measure the intensity of pERK signal/ROI across different timepoints. The background was used as blank to be subtracted. The same number of ROI/sample was acquired from different slices of thymic tissue. **F**, Western blot showing expression of GPR39 on whole thymus tissue and in thymic exECs. Skeletal muscle was used as negative control and intestine as positive control. **G**, *Gpr39* expression measured by qPCR in exECs after silencing with siRNA. Graphs represent mean ± SEM.

**Figure S6**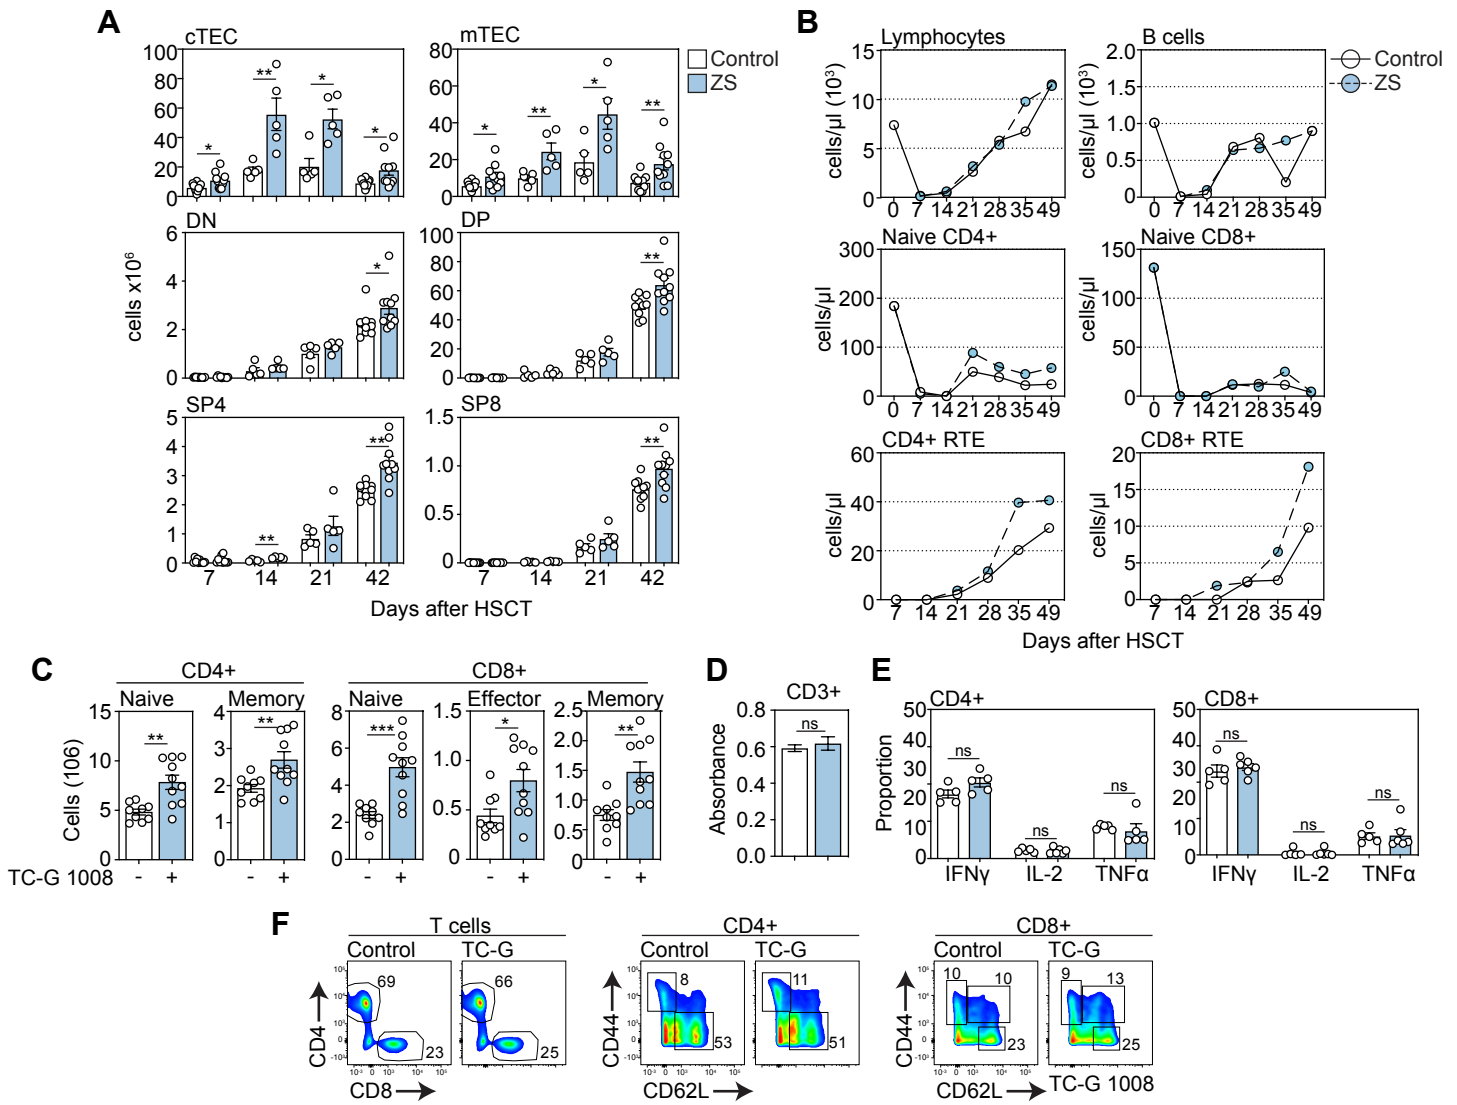**Supplementary Figure 6**

6-8-week-old male C57BL/6 mice were given supplemental Zn in drinking water (300mg/kg/day ZnSO<sub>4</sub>) for 21 days at which point mice were given a lethal dose of TBI (2 x 550cGy) along with T cell depleted BM from female C57BL/6 mice. Mice were maintained on ZnSO<sub>4</sub> in drinking water for the duration of the study (n=5-10/group/ti-mepoint combined from two independent experiments). **A**, Total number of cTECs, mTECs, DN, DP, SP4, and SP8 thymocytes at days 7, 21, 28, and 42 after allo-HCT. **B**, Numbers of lymphocytes, B cells, CD4+ and CD8+ naive and RTEs in peripheral blood. **C**, Numbers of CD4+ and CD8+ subpopulations on spleen (n=6/group, from two separate experiments). **D-E**, CD3+ T cells were isolated from spleen at day 40 after HSCT and stimulated for 72h with anti-CD3 and anti-CD28. **D**, Proliferation of all T cells (n=6/group, from two separate experiments). **E**, Intracellular cytokine staining (ICS) for IFN $\gamma$ , IL2, and TNF $\alpha$  on CD4+ and CD8+ (n=5/group, from two separate experiments). **F**, Phenotype of T cells on lymph nodes harvested at day 40 after HSCT from mice treated with vehicle or TC-G1008 (see the main text). Concatenated flow plots from n=5 biological replicates are shown. Graphs represent mean  $\pm$  SEM, each dot represents a biologically independent observation. \*, p<0.05; \*\*, p<0.01; \*\*\*, p<0.001.
